# Supplementary material for: Tau, XMAP215/Msps and Eb1 co-operate interdependently to regulate microtubule polymerisation and bundle formation in axons
Source: PLoS Genet. 2021 Jul 6;17(7):e1009647. doi: 10.1371/journal.pgen.1009647 (PMC8284659; doi:10.1371/journal.pgen.1009647)
Supplement: S11 Data — (XLSX) [file pgen.1009647.s019.xlsx]

## Sheet: S5C Fig
		Control	Tau 50%KD	XMAP 50%KD	EB3 50%KD	XMAP215/Tau/EB3 50%KD			Number of families	1
	Number of values	131	83	72	47	41			Number of comparisons per family	7
									Alpha	0.05
	Minimum	0.4312	0.4759	0.4687	0.6743	0.6034
	25% Percentile	0.7808	0.7446	0.6453	0.7915	0.6906			Dunn's multiple comparisons test	Mean rank diff.	Significant?	Summary	Adjusted P Value	A-?
	Median	0.9944	0.9071	0.7378	0.8807	0.7715			Control vs. Tau 50%KD	17.33	No	ns	>0.9999	B	Tau 50%KD
	75% Percentile	1.182	1.145	1.097	1.087	0.9351			Control vs. XMAP 50%KD	69.51	Yes	****	<0.0001	C	XMAP 50%KD
	Maximum	1.759	1.762	2.101	1.373	1.275			Control vs. EB3 50%KD	19.52	No	ns	>0.9999	D	EB3 50%KD
									Control vs. XMAP215/Tau/EB3 50%KD	69.51	Yes	**	0.0013	E	XMAP215/Tau/EB3 50%KD
	Mean	1	0.9581	0.8673	0.9313	0.8338			XMAP215/Tau/EB3 50%KD vs. Control	-69.51	Yes	**	0.0013	A	Control
	Std. Deviation	0.2801	0.2715	0.3389	0.1793	0.188			XMAP215/Tau/EB3 50%KD vs. Tau 50%KD	-52.18	Yes	*	0.0458	B	Tau 50%KD
	Std. Error of Mean	0.02447	0.0298	0.03994	0.02616	0.02937			XMAP215/Tau/EB3 50%KD vs. XMAP 50%KD	0.001016	No	ns	>0.9999	C	XMAP 50%KD
									XMAP215/Tau/EB3 50%KD vs. EB3 50%KD	-49.98	No	ns	0.122	D	EB3 50%KD
	Lower 95% CI of mean	0.9516	0.8988	0.7877	0.8787	0.7744
	Upper 95% CI of mean	1.048	1.017	0.947	0.984	0.8931			Test details	Mean rank 1	Mean rank 2	Mean rank diff.	n1	n2	Z
									Control vs. Tau 50%KD	214.8	197.5	17.33	131	83	1.143
	Sum	131	79.52	62.45	43.77	34.18			Control vs. XMAP 50%KD	214.8	145.3	69.51	131	72	4.383
									Control vs. EB3 50%KD	214.8	195.3	19.52	131	47	1.062
	D'Agostino & Pearson normality test								Control vs. XMAP215/Tau/EB3 50%KD	214.8	145.3	69.51	131	41	3.593
	K2	3.359	4.283	33.11	4.338	7.156			XMAP215/Tau/EB3 50%KD vs. Control	145.3	214.8	-69.51	41	131	3.593
	P value	0.1864	0.1175	<0.0001	0.1143	0.0279			XMAP215/Tau/EB3 50%KD vs. Tau 50%KD	145.3	197.5	-52.18	41	83	2.528
	Passed normality test (alpha=0.05)?	Yes	Yes	No	Yes	No			XMAP215/Tau/EB3 50%KD vs. XMAP 50%KD	145.3	145.3	0.001016	41	72	4.805e-05
	P value summary	ns	ns	****	ns	*			XMAP215/Tau/EB3 50%KD vs. EB3 50%KD	145.3	195.3	-49.98	41	47	2.164

## Sheet: S5D Fig
		Control	Tau 50%KD	XMAP 50%KD	EB3 50%KD	XMAP215/Tau/EB3 50%KD			Number of families	1
	Number of values	131	83	72	47	41			Number of comparisons per family	7
									Alpha	0.05
	Minimum	0.7301	0.7392	0.7642	0.7172	0.5049
	25% Percentile	0.8833	0.9018	0.9088	0.9001	0.633			Dunn's multiple comparisons test	Mean rank diff.	Significant?	Summary	Adjusted P Value
	Median	1.005	0.9637	0.9666	1.016	0.7236			Control vs. Tau 50%KD	14.88	No	ns	>0.9999	A-B
	75% Percentile	1.093	1.051	1.045	1.143	0.8429			Control vs. XMAP 50%KD	14.1	No	ns	>0.9999	A-C
	Maximum	1.427	1.222	1.249	1.473	1.026			Control vs. EB3 50%KD	-11.44	No	ns	>0.9999	A-D
									Control vs. XMAP215/Tau/EB3 50%KD	157.7	Yes	****	<0.0001	A-E
	Mean	1	0.9812	0.9813	1.025	0.7469			Tau 50%KD vs. XMAP215/Tau/EB3 50%KD	142.8	Yes	****	<0.0001	B-E
	Std. Deviation	0.1344	0.1164	0.1043	0.162	0.1301			XMAP 50%KD vs. XMAP215/Tau/EB3 50%KD	143.6	Yes	****	<0.0001	C-E
	Std. Error of Mean	0.01175	0.01278	0.01229	0.02362	0.02032			EB3 50%KD vs. XMAP215/Tau/EB3 50%KD	169.1	Yes	****	<0.0001	D-E
	Lower 95% CI of mean	0.9768	0.9558	0.9568	0.977	0.7058			Test details	Mean rank 1	Mean rank 2	Mean rank diff.	n1	n2	Z
	Upper 95% CI of mean	1.023	1.007	1.006	1.072	0.788			Control vs. Tau 50%KD	209.4	194.5	14.88	131	83	0.9814
									Control vs. XMAP 50%KD	209.4	195.3	14.1	131	72	0.8892
	Sum	131	81.44	70.65	48.15	30.62			Control vs. EB3 50%KD	209.4	220.8	-11.44	131	47	0.6225
									Control vs. XMAP215/Tau/EB3 50%KD	209.4	51.68	157.7	131	41	8.151
	D'Agostino & Pearson normality test								Tau 50%KD vs. XMAP215/Tau/EB3 50%KD	194.5	51.68	142.8	83	41	6.92
	K2	2.283	2.168	5.229	1.544	2.457			XMAP 50%KD vs. XMAP215/Tau/EB3 50%KD	195.3	51.68	143.6	72	41	6.788
	P value	0.3194	0.3382	0.0732	0.4621	0.2928			EB3 50%KD vs. XMAP215/Tau/EB3 50%KD	220.8	51.68	169.1	47	41	7.321
	Passed normality test (alpha=0.05)?	Yes	Yes	Yes	Yes	Yes
	P value summary	ns	ns	ns	ns	ns
